# Supplementary material
Source: PubMed Central journal article supplement (PMC8028686)
Supplement: BPA-29-502-s001.pdf [file BPA-29-502-s001.pdf]

### Supplementary Table 3

| <b>qPCR in mouse tissues</b>   | <b>Sequences</b>                                                                                                                                               |
|--------------------------------|----------------------------------------------------------------------------------------------------------------------------------------------------------------|
| GAPDH                          | F: 5'-GGTGGTGAAGCAGGCATCT-3'<br>R: 5'-GAAGGTGGAAGAGTGGGAGTT-3'                                                                                                 |
| HPRT                           | F: 5'-ATGGGAGGCCATCACATTGT-3'<br>R: 5'-ATGTAATCCAGCAGGTCAGCAA-3'                                                                                               |
| EGR1                           | F: 5'-GAGCGAACAACCCTATGAG-3'<br>R: 5'-GTCGTTTGGCTGGGATAA-3'                                                                                                    |
| AChE                           | F: 5'-ACCTGTGGGCTCACGTAGATT-3'<br>R: 5'-CCACGTACTGGTAGCAGACATT-3'                                                                                              |
| <b>AChE promoter cloning</b>   |                                                                                                                                                                |
| -193/+707 pGL3                 | F: 5'-AGATCTTGGCACTGGAGTGCGTCTGGG-3'<br>R: 5'-AAGCTTCTCCAGCCAAAGGATCAAAA-3'                                                                                    |
| +108/+707 pGL3                 | F: 5'-AGATCTAGGCCCGGGTCCGGGGCACC-3'<br>R: 5'-AAGCTTCTCCAGCCAAAGGATCAAAA-3'                                                                                     |
| -193/+107 pGL3                 | F: 5'-GAAGATCTTGGCACTGGAGTGCGTCTGG-3'<br>R: 5'-CCCAAGCTTTAAGGAGAGTCCCGGGCG-3'                                                                                  |
| -98/+107 pGL3                  | F: 5'-TAGCAGATCTGCGGGGGCGGAGACAGT-3'<br>R: 5'-TAGCAAGCTTTAAGGAGAGTCCCGGGCG-3'                                                                                  |
| -60/+107 pGL3                  | F: 5'-TAGCAGATCTCTGTGAGGCCCGGAGGG-3'<br>R: 5'-TAGCAAGCTTTAAGGAGAGTCCCGGGCG-3'                                                                                  |
| <b>AChE promoter mutations</b> |                                                                                                                                                                |
| Mutation 1                     | F1: 5'-GAAGATCTTGGCACTGGAGTGCGTCTGG-3'<br>R1: 5'-CACTGTCTCCGCCctCCGCCCTCC-3'<br>F2: 5'-GGAGGGGCGGaaGGGCGGAGACAGTG-3'<br>R2: 5'-TAGCAAGCTTTAAGGAGAGTCCCGGGCG-3' |
| Mutation 2                     | F1: 5'-GAAGATCTTGGCACTGGAGTGCGTCTGG-3'                                                                                                                         |

|            |                                        |
|------------|----------------------------------------|
|            | R1: 5'-GCCCCGCCttCCGCCCACTGTC-3'       |
|            | F2: 5'-GACAGTGGGCGGaaGGGCGGGC-3'       |
|            | R2: 5'-TAGCAAGCTTTAAGGAGAGTCCCGGGCG-3' |
| Mutation 3 | F1: 5'-GAAGATCTTGGCACTGGAGTGCGTCTGG-3' |
|            | R1: 5'-GCCTCACAGCGtttCCGCCCGCC-3'      |
|            | F2: 5'-GGCGGGCGGaaaCGCTGTGAGGC-3'      |
|            | R2: 5'-TAGCAAGCTTTAAGGAGAGTCCCGGGCG-3' |

---

**qPCR in SY5Y cells**

---

|      |                                |
|------|--------------------------------|
| HPRT | F: 5'-GGACAGGACTGAACGTCTTGC-3' |
|      | R: 5'-ATAGCCCCCCTTGAGCACAC-3'  |
| EGR1 | F: 5'-GACCGCAGAGTCTTTTCCTG-3'  |
|      | R: 5'-TGGGTTGGTCATGCTACTA-3'   |
| AChE | F: 5'-GTAGACGCTACAACCTTCCA-3'  |
|      | R: 5'-CATCTCGGTGCCCTCAA-3'     |

---

**Table S3.** Primer sequences for qPCR. GAPDH = glyceraldehyde phosphate dehydrogenase; HPRT = hypoxanthine guanine phosphoribosyl transferase; EGR1 = early growth response 1; AChE = acetylcholinesterase; F = forward primer; R = reverse primer.
