# Supplementary material
Source: PubMed Central journal article supplement (PMC8028686)
Supplement: BPA-29-502-s002.pdf [file BPA-29-502-s002.pdf]

**Supplementary Table 1**

| <b>Braak stage</b> | <b>NBB number</b> | <b>Age</b> | <b>Sex</b> | <b>CSF pH</b> | <b>PMD (min)</b> | <b>ApoE-ε4</b> | <b>Medication (last 3 months)</b>         |
|--------------------|-------------------|------------|------------|---------------|------------------|----------------|-------------------------------------------|
| 0                  | 01-004            | 64         | F          | 6,4           | 515              | 42             | Corticosteroids                           |
| 0                  | 97-116            | 80         | M          | 6,6           | 416              | 33             | Corticosteroids                           |
| 0                  | 98-101            | 72         | M          | N/A           | 405              | 43             | Corticosteroids, benzodiazepines          |
| 0                  | 99-116            | 78         | M          | N/A           | 260              | 33             | Benzodiazepines, opiates                  |
| 0                  | 00-050            | 52         | F          | 7,16          | 410              | 33             |                                           |
| 0                  | 05-032            | 74         | M          | 6,42          | 465              | 43             | Corticosteroids, benzodiazepines          |
| 0                  | 94-063            | 74         | F          | 7,04          | 335              | 33             | Barbiturates                              |
| I                  | 00-017            | 72         | F          | 6,52          | 405              | 43             | Benzodiazepines, opiates                  |
| I                  | 01-045            | 83         | M          | 6,49          | 275              | 33             | Corticosteroids, benzodiazepines, opiates |
| I                  | 00-032            | 78         | F          | 7,02          | 390              | 43             | Benzodiazepines, opiates                  |
| I                  | 00-049            | 78         | M          | 6,42          | 415              | 33             | Benzodiazepines                           |
| I                  | 01-029            | 90         | F          | 6,58          | 325              | 32             | Benzodiazepines                           |
| I                  | 99-100            | 79         | M          | 6,72          | 320              | 33             | Corticosteroids, opiates                  |
| I                  | 00-142            | 82         | F          | 6,6           | 330              | 32             |                                           |
| II                 | 97-043            | 68         | M          | 7,08          | 610              | 33             |                                           |
| II                 | 94-051            | 79         | M          | 6,62          | 435              | 33             |                                           |
| II                 | 96-084            | 78         | F          | 6,6           | 450              | 43             | Corticosteroids                           |
| II                 | 99-046            | 89         | F          | 6,62          | 310              | 32             | Benzodiazepines                           |
| II                 | 97-005            | 69         | F          | 6,8           | 430              | 43             | Opiates                                   |

|     |        |    |   |      |     |    |                                                           |
|-----|--------|----|---|------|-----|----|-----------------------------------------------------------|
| II  | 98-126 | 71 | M | 6,54 | 360 | 43 | Corticosteroids, benzodiazepines, opiates, antipsychotics |
| II  | 00-022 | 83 | F | 6,52 | 465 | 33 |                                                           |
| III | 97-039 | 87 | M | 7,39 | 240 | 33 | Benzodiazepines                                           |
| III | 98-107 | 74 | F | 6,64 | 220 | 43 | Benzodiazepines                                           |
| III | 98-189 | 81 | M | 6,64 | 320 | 33 | Benzodiazepines                                           |
| III | 96-125 | 93 | M | 6,8  | 625 | 43 | ACE-inhibitor                                             |
| III | 98-112 | 84 | F | N/A  | 560 | 33 | Benzodiazepines and antipsychotics                        |
| III | 03-006 | 91 | F | 6,51 | 320 | 32 |                                                           |
| III | 99-074 | 85 | F | 6,34 | 320 | 33 |                                                           |
| IV  | 02-036 | 86 | F | 6,42 | 475 | 43 | Benzodiazepines, opiates, antipsychotics                  |
| IV  | 00-076 | 88 | F | 6,96 | 210 | 33 | Benzodiazepines, opiates                                  |
| IV  | 00-104 | 86 | M | 6,38 | 360 | 33 |                                                           |
| IV  | 97-125 | 75 | F | 6,59 | 205 | 33 | Benzodiazepines, opiates                                  |
| IV  | 97-148 | 79 | M | 6,41 | 345 | 43 | Antipsychotics                                            |
| IV  | 93-034 | 78 | M | 6,64 | 270 | 43 | Benzodiazepines, opiates, antipsychotics                  |
| IV  | 01-010 | 84 | F | 6,61 | 255 | 32 | Opiates                                                   |
| V   | 00-021 | 71 | F | 6,36 | 330 | 43 | Benzodiazepines, antipsychotics                           |
| V   | 01-141 | 69 | F | 6,65 | 420 | 42 | Benzodiazepines, antipsychotics                           |
| V   | 01-063 | 85 | M | 6,38 | 285 | 43 | Benzodiazepines, opiates                                  |
| V   | 97-124 | 67 | M | 6,62 | 260 | 33 | Benzodiazepines, opiates                                  |
| V   | 98-022 | 78 | M | 6,72 | 360 | 43 | Opiates, antipsychotics                                   |
| V   | 01-042 | 71 | F | 6,35 | 405 | 33 | Benzodiazepines, antipsychotics                           |
| V   | 99-105 | 79 | M | 6,6  | 225 | 33 | Opiates                                                   |

|    |        |    |   |      |     |    |                                          |
|----|--------|----|---|------|-----|----|------------------------------------------|
| VI | 00-066 | 80 | M | 7,08 | 260 | 43 | Benzodiazepines, opiates, antipsychotics |
| VI | 00-044 | 80 | F | 6,68 | 320 | 44 | Benzodiazepines                          |
| VI | 98-147 | 67 | M | 6,7  | 305 | 43 | Opiates                                  |
| VI | 04-023 | 67 | F | 6,75 | 350 | 33 | Benzodiazepines, opiates                 |
| VI | 03-057 | 68 | F | 6,5  | 230 | 32 | Benzodiazepines, opiates                 |
| VI | 96-020 | 58 | M | 6,99 | 310 | 33 |                                          |
| VI | 00-140 | 72 | F | 6,61 | 225 | 43 | Benzodiazepines, antipsychotics          |

**Table S1.** Clinicopathological details of included subjects. Braak stage: neuropathological progression in Alzheimer’s disease (AD) (Braak and Braak, 1991). Reisberg scale: clinical progression in AD (Reisberg et al., 1982). F = female; M = male; CSF = cerebrospinal fluid; PMD = postmortem delay (minutes); RIN = RNA integrity number.
